# Supplementary material
Source: PubMed Central journal article supplement (PMC3799201)
Supplement: tlo0605_0596SD1.pdf [file tlo0605_0596SD1.pdf]

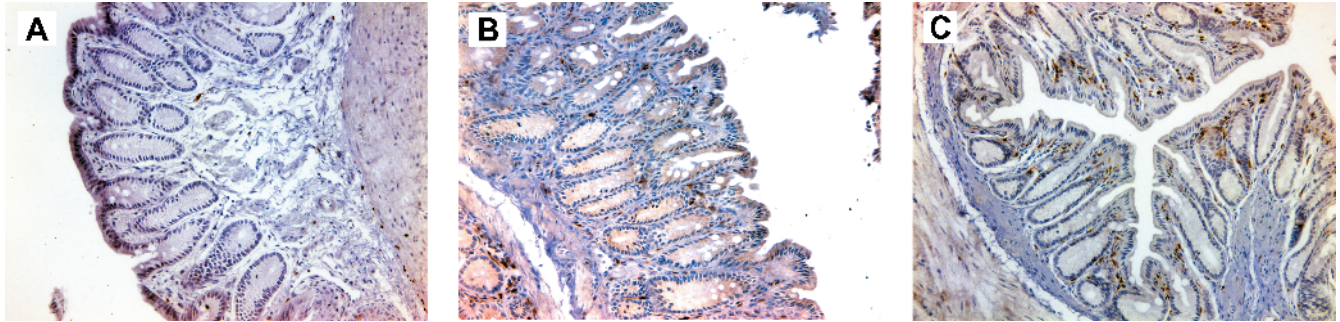

**Figure W1.** iNOS expression in colon macrophages indicates M1 polarization. (A) Few macrophages in the lamina propria in colon biopsies from wild-type mice colonized with *E. faecalis* and administered ELC stain positive for iNOS (brown). (B) A limited number of macrophages stain for iNOS in the lamina propria for sham-colonized *Il10*<sup>-/-</sup> mice administered ELC. (C) Numerous macrophages in the lamina propria stain for iNOS in biopsies for *E. faecalis*-colonized *Il10*<sup>-/-</sup> mice administered ELC. All photomicrographs are ×20.

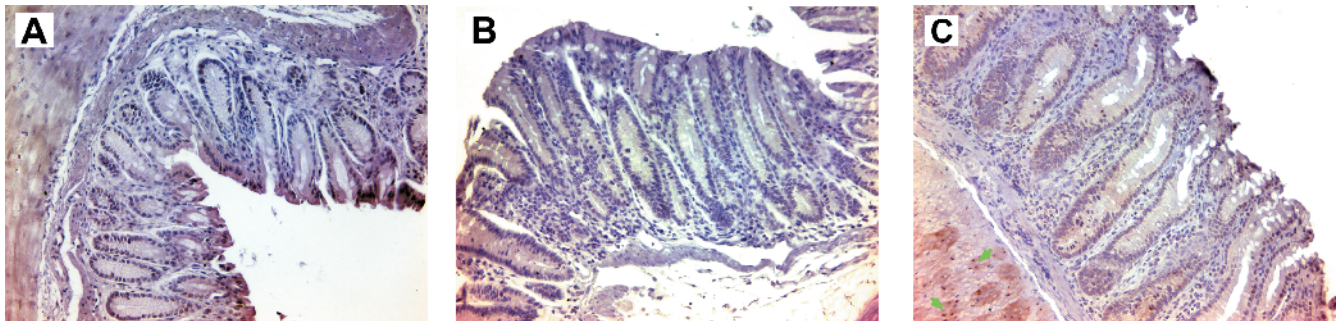

**Figure W2.** Lack of arginase 1 expression in colon macrophages is consistent with M1 polarization. (A) Immunohistochemical staining for arginase 1 is infrequent in macrophages in the lamina propria of colon biopsies from wild-type mice colonized with *E. faecalis* and administered ELC. (B) Similar staining is seen for sham-colonized *Il10*<sup>-/-</sup> mice administered ELC and (C) *E. faecalis*-colonized *Il10*<sup>-/-</sup> mice administered ELC, indicating M1 polarization of macrophages. Of note, unidentified cells in the muscularis externa of biopsies from *E. faecalis*-colonized *Il10*<sup>-/-</sup> mice administered ELC stain for arginase 1 (C, arrows). All photomicrographs are ×20.
